Supporting information

**Table S1.** Characteristics of the initiators of simvastatin and atorvastatin therapy between January 1998 and June 2006 in Finland.

|                                                                        | Simvastatin (n=180 238) | Atorvastatin (n=118 623) |
|------------------------------------------------------------------------|-------------------------|--------------------------|
|                                                                        | n (%)                   | n (%)                    |
| Female                                                                 | 92 060 (51.1)           | 58 520 (49.3)            |
| Age in years, mean (SD)                                                | 61.4 (8.0)              | 60.3 (8.0)               |
| <b>Age category</b>                                                    |                         |                          |
| 45–55 years                                                            | 47 259 (26.4)           | 37 659 (31.6)            |
| 56–65 years                                                            | 70 117 (38.9)           | 45 974 (38.8)            |
| 66–75 years                                                            | 62 592 (34.7)           | 34 990 (29.5)            |
| <b>Number of hospital days during 365 days prior to the initiation</b> |                         |                          |
| 0                                                                      | 124 889 (69.3)          | 86 105 (72.6)            |
| 1–7                                                                    | 34 337 (19.1)           | 21 282 (17.9)            |
| 8–30                                                                   | 17 408 (9.7)            | 9117 (7.7)               |
| 31–365                                                                 | 3604 (2.0)              | 2119 (1.8)               |
| <b>Comorbidities</b>                                                   |                         |                          |
| <i>CVD, PTCA or CAPG in relation to the initiation</i>                 |                         |                          |
| None in preceding 7 years                                              | 172 936 (84.9)          | 105 420 (88.5)           |
| Only earlier than 30 days                                              | 11 952 (5.9)            | 6241 (5.2)               |
| Only during the preceding 30 days                                      | 15 548 (7.6)            | 6276 (5.3)               |
| Both prior to and during 30 days                                       | 3171 (1.6)              | 1214 (1.0)               |
| <i>Hospitalized during 7 years prior to the initiation</i>             |                         |                          |
| Diabetes                                                               | 9137 (5.1)              | 5555 (4.7)               |
| Hypertension                                                           | 13 256 (7.4)            | 8328 (7.0)               |
| Stroke                                                                 | 9914 (5.5)              | 7383 (6.2)               |
| Cardiac insufficiency                                                  | 2514 (1.4)              | 1334 (1.1)               |
| Atherosclerotic CVD                                                    | 2724 (1.5)              | 1603 (1.4)               |
| Atherosclerosis in lower legs                                          | 1157 (0.6)              | 683 (0.6)                |
| <i>Hospitalized during 365 days prior to the initiation</i>            |                         |                          |
| Atrial fibrillation                                                    | 2259 (1.3)              | 1315 (1.1)               |
| Any cancer diagnosis                                                   | 1088 (0.6)              | 754 (0.6)                |
| COPD/Asthma                                                            | 758 (0.4)               | 392 (0.3)                |
| Renal insufficiency                                                    | 80 (0.0)                | 67 (0.1)                 |
| Dementia                                                               | 115 (0.1)               | 48 (0.0)                 |
| Psychotic disease                                                      | 418 (0.2)               | 271 (0.2)                |
| Depression                                                             | 421 (0.2)               | 265 (0.2)                |
| Organ transplantation                                                  | 35 (0.0)                | 17 (0.0)                 |
| <i>Comorbidities based on the Special Reimbursement Register#</i>      |                         |                          |
| Diabetes                                                               | 20 610 (11.4)           | 12 373 (10.4)            |
| Hypothyroidism                                                         | 6583 (3.7)              | 3943 (3.3)               |
| Psychotic disorders                                                    | 4787 (2.7)              | 2907 (2.5)               |
| Severe psychotic disease                                               | 312 (0.2)               | 177 (0.2)                |
| Breast cancer                                                          | 8433 (0.9)              | 513 (0.9)                |
| Prostate cancer                                                        | 797 (0.9)               | 501 (0.8)                |

Continues

**Table 1.** Continued

|                                                                                                      | Simvastatin (n=180 238) | Atorvastatin (n=118 623) |
|------------------------------------------------------------------------------------------------------|-------------------------|--------------------------|
|                                                                                                      | n (%)                   | n (%)                    |
| Leukemia                                                                                             | 474 (0.3)               | 289 (0.2)                |
| Gynecologic cancers                                                                                  | 112 (0.1)               | 74 (0.1)                 |
| Other cancers                                                                                        | 202 (0.1)               | 116 (0.1)                |
| Prior organ transplantation                                                                          | 262 (0.2)               | 164 (0.1)                |
| Uremia with dialysis                                                                                 | 186 (0.1)               | 129 (0.1)                |
| Use of interferon alpha                                                                              | 29 (0.0)                | 23 (0.0)                 |
| Cardiac insufficiency                                                                                | 5444 (3.0)              | 2827 (2.4)               |
| Rheumatic disease                                                                                    | 5298 (2.9)              | 3176 (2.7)               |
| Asthma                                                                                               | 12 498 (6.9)            | 7142 (6.0)               |
| Chronic hypertension                                                                                 | 57 333 (31.8)           | 36 491 (30.8)            |
| CAD                                                                                                  | 30 109 (16.7)           | 14 923 (12.6)            |
| Dysrhythmia                                                                                          | 4299 (2.4)              | 2558 (2.2)               |
| Familial dyslipidemia                                                                                | 81 (0.0)                | 89 (0.1)                 |
| Dyslipidemia with CAD                                                                                | 8206 (4.6)              | 4890 (4.1)               |
| Clopidogrel use with CAD                                                                             | 182 (0.1)               | 110 (0.1)                |
| Clopidogrel use with other indications                                                               | 507 (0.3)               | 310 (0.3)                |
| Use of donepezil, galantamine, memantine, or rivastigmine                                            | 339 (0.2)               | 261 (0.2)                |
| Parkinsonism                                                                                         | 595 (0.3)               | 356 (0.3)                |
| Epilepsy                                                                                             | 2213 (1.2)              | 1472 (1.2)               |
| <b>Medication</b>                                                                                    |                         |                          |
| <i>Number of different reimbursed preparations purchased during 4 months prior to the initiation</i> |                         |                          |
| 1–5                                                                                                  | 20 292 (11.3)           | 9659 (8.1)               |
| 6–10                                                                                                 | 45 668 (25.3)           | 27 443 (23.1)            |
| 11–15                                                                                                | 41 668 (23.1)           | 28 389 (23.9)            |
| 16–20                                                                                                | 29 127 (16.2)           | 20 735 (17.5)            |
| >20                                                                                                  | 43 463 (24.1)           | 32 406 (27.3)            |
| <i>At least one purchase during 365 days prior to the initiation</i>                                 |                         |                          |
| Diabetes drugs                                                                                       | 28 263 (15.7)           | 17 664 (14.9)            |
| Antithrombotic agents                                                                                | 22 368 (12.4)           | 13 811 (11.5)            |
| Organic nitrates and cardiac glycosides                                                              | 42 682 (23.7)           | 22 183 (18.7)            |
| Centrally acting hypertension drugs                                                                  | 1475 (0.8)              | 949 (0.8)                |
| Diuretics                                                                                            | 28 882 (16.0)           | 17 703 (14.9)            |
| Peripheral vasodilators                                                                              | 217 (0.1)               | 141 (0.1)                |
| Beta-blocking agents                                                                                 | 79 683 (44.2)           | 46 783 (39.4)            |
| Selective calcium channels blockers                                                                  | 31 943 (17.7)           | 19 831 (16.7)            |
| ACEI or ARB                                                                                          | 61 658 (34.2)           | 38 362 (32.3)            |
| Non-statin lipid lowering drug                                                                       | 1296 (0.7)              | 2048 (1.7)               |
| Drugs for obstructive airway diseases                                                                | 18 648 (10.4)           | 11 381 (9.6)             |
| Anti-dementia drugs                                                                                  | 203 (0.1)               | 147 (0.1)                |
| Antidepressants                                                                                      | 17 056 (9.5)            | 11 598 (9.8)             |
| Antipsychotics                                                                                       | 5062 (2.8)              | 3175 (2.7)               |

Continues

**Table 1.** Continued

|                       | <b>Simvastatin (n=180 238)</b> | <b>Atorvastatin (n=118 623)</b> |
|-----------------------|--------------------------------|---------------------------------|
|                       | <b><i>n</i> (%)</b>            | <b><i>n</i> (%)</b>             |
| Antineoplastic agents | 886 (0.5)                      | 627 (0.5)                       |

CVD, cardiovascular disease; PTCA, percutaneous transluminal coronary angioplasty; CAPG, coronary artery bypass graft surgery; COPD, chronic obstructive pulmonary disease; CAD, coronary artery disease; ACEI, angiotensin –converting –enzyme inhibitor; ABR, angiotensin receptor blocker  
#Eligibility to special reimbursement any time prior to the initiation
