Supporting information.

**Table S3.** Covariate balance within selected periods and across all periods, presented as the standardized difference.

| <b>Covariate</b> | <b>Period<sup>1</sup></b> | <b>Unmatched cohort</b> | <b>Cohort-wide PS-matched cohort</b> | <b>Sequentially PS-matched cohort</b> |
|------------------|---------------------------|-------------------------|--------------------------------------|---------------------------------------|
| Mean age         | 1–17                      | 0.061                   | 0.001                                | 0.006                                 |
|                  | 1                         | 0.006                   | 0.038                                | 0.013                                 |
|                  | 8                         | 0.043                   | 0.012                                | 0.013                                 |
|                  | 17                        | 0.057                   | 0.002                                | 0.015                                 |
| Prior CVD        | 1–17                      | 0.172                   | 0.007                                | 0.002                                 |
|                  | 1                         | 0.438                   | 0.210                                | 0.036                                 |
|                  | 8                         | 0.316                   | 0.118                                | 0.000                                 |
|                  | 17                        | 0.031                   | 0.175                                | 0.031                                 |
| Prior stroke     | 1–17                      | 0.041                   | 0.002                                | 0.011                                 |
|                  | 1                         | 0.103                   | 0.153                                | 0.023                                 |
|                  | 8                         | 0.065                   | 0.022                                | 0.024                                 |
|                  | 17                        | 0.204                   | 0.176                                | 0.000                                 |
| Diabetes         | 1–17                      | 0.023                   | 0.001                                | 0.000                                 |
|                  | 1                         | 0.137                   | 0.201                                | 0.036                                 |
|                  | 8                         | 0.046                   | 0.064                                | 0.000                                 |
|                  | 17                        | 0.091                   | 0.080                                | 0.005                                 |
| Hypertension     | 1–17                      | 0.008                   | 0.001                                | 0.002                                 |
|                  | 1                         | 0.060                   | 0.023                                | 0.010                                 |
|                  | 8                         | 0.025                   | 0.064                                | 0.005                                 |
|                  | 17                        | 0.067                   | 0.070                                | 0.018                                 |

<sup>1</sup>6-month periods starting from January 1998 and ending June 2006

PS = propensity score; CDV = acute myocardial infarction, ischemic cardiac disease, percutaneous coronary intervention, or coronary artery bypass surgery.

Diabetes was based on purchase of reimbursed antidiabetic drugs during the preceding 365 days.
