Supporting information

**Table S4.** Comparative effectiveness among initiators of atorvastatin (10 mg) versus simvastatin (40 mg) between January 1998 and June 2006 in Finland; hazard ratios for a composite of cardiovascular events<sup>1</sup> estimated with different Cox proportional hazard regression models

| <b>Models</b>                                    | <b>HR (95% CI)</b> |
|--------------------------------------------------|--------------------|
| <i>Conventional outcome models (n=104736)</i>    |                    |
| Unadjusted                                       | 0.53 (0.49-0.57)   |
| Adjusted <sup>2</sup>                            | 0.83 (0.77-0.91)   |
| <i>PS models</i>                                 |                    |
| Matched by PS, unadjusted <sup>3</sup> (n=14008) | 0.94 (0.84-1.06)   |

HR = hazard ratio; CI = confidence interval; PS = propensity score

<sup>1</sup>Cardiovascular events; hospitalized acute myocardial infarction ischemic cardiac disease (ICD-10 codes I20–I24), percutaneous coronary intervention or coronary artery bypass surgery, and stroke (I63, I64)

<sup>2</sup>Adjusted for all covariates included in the propensity scores, including the period

<sup>3</sup>Period included in the propensity score. Matching within the whole cohort within a 0.01 caliber

<sup>4</sup>Adjusted for the covariates strongly associated with the outcome
